# Supplementary material
Source: PubMed Central journal article supplement (PMC2967815)
Supplement: NIHMS32355-supplement-SuppInf.pdf [file NIHMS32355-supplement-SuppInf.pdf]

Supplement Figure 1

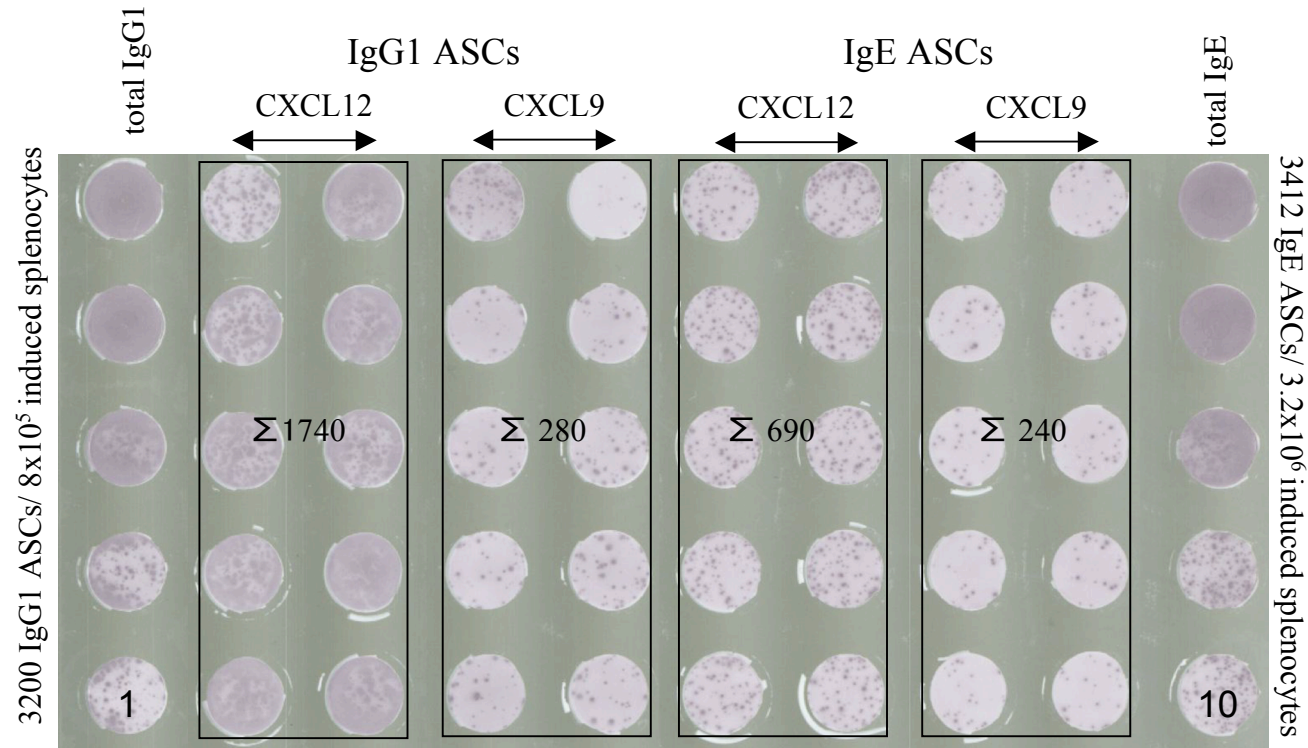

**Transwell migration assay of IgE- and IgG1-ASCs.**

ELISpot analysis of pooled activated cells originating from 3 WT mice after migration.

3200 IgG1-ASCs/8x10<sup>5</sup> (lane 1 serially diluted) and 3412 IgE-ASCs/3,2x10<sup>6</sup> (lane 10 serially diluted) were defined as potentially migrating cells and set as 100%. Migrated cells were distributed onto 10 wells.

Values represent total counted spots of 10 corresponding wells each.

Supplement Figure 2

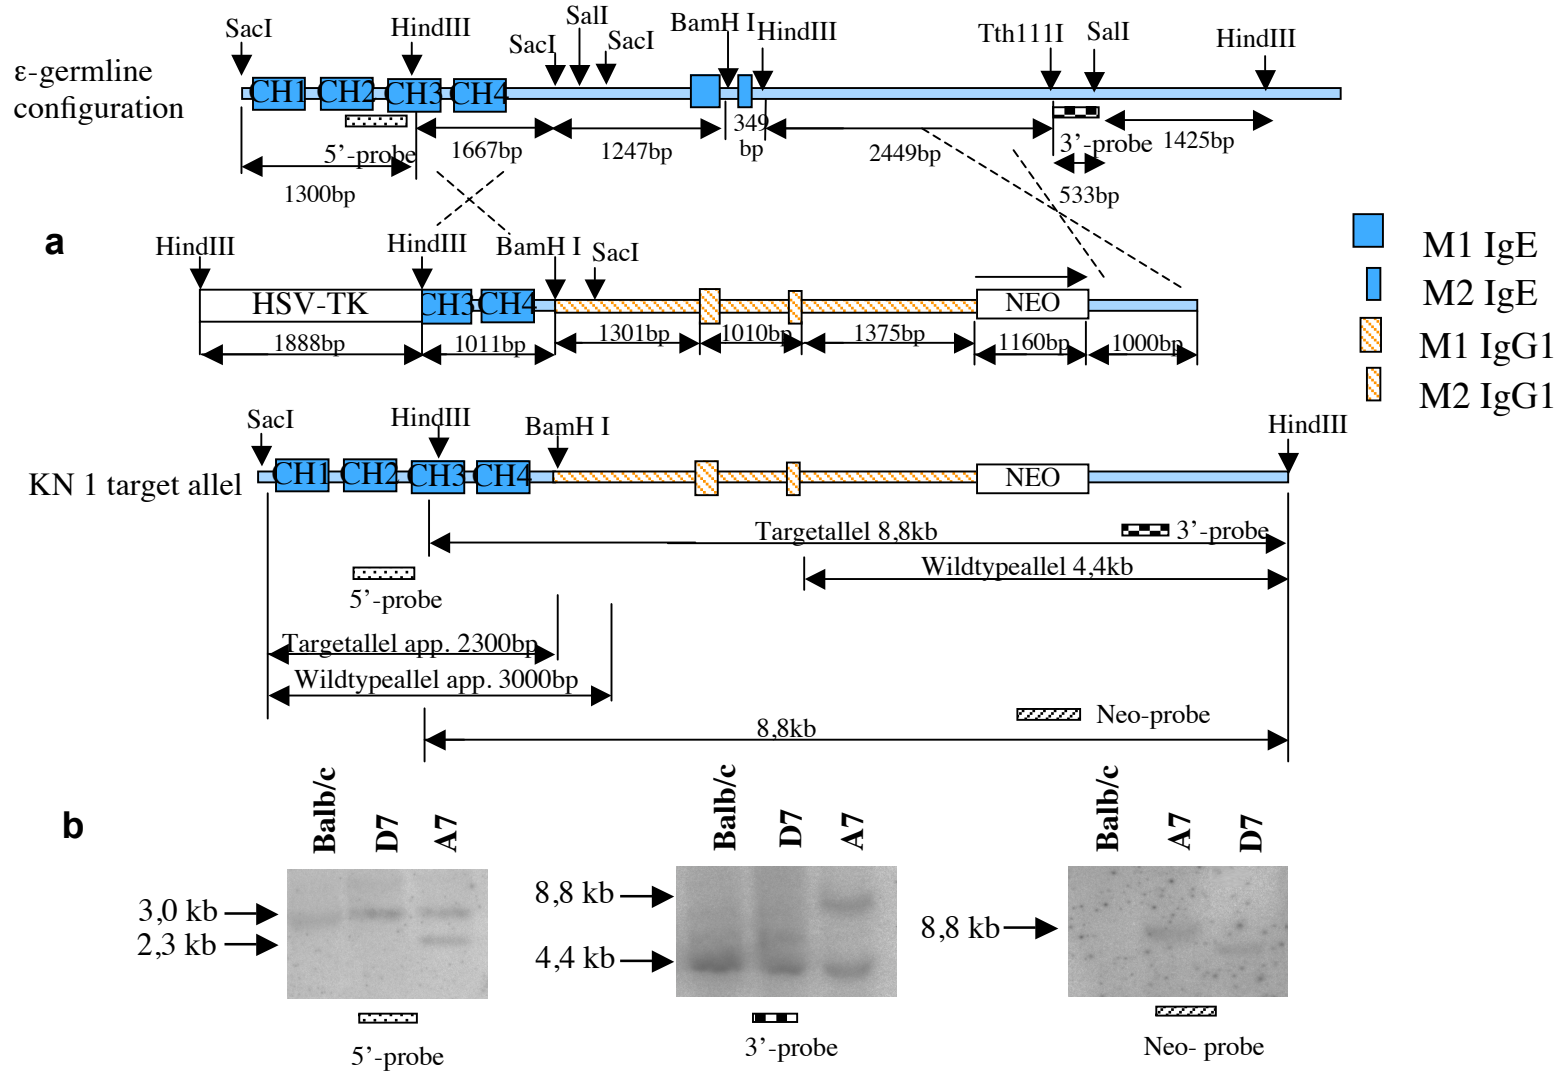

**Construction of the target vector and Southern blot analysis.**

(a) The  $\gamma 1$  membrane region was inserted 3' of the secretory  $\epsilon$  poly(A) site. The 3' untranslated  $\gamma 1$  region is flanked by a Tk-NEO gene, followed by 1 kb of  $\epsilon$  specific 3' untranslated genomic sequence. 5' of the partial CH3 constant domain of the  $\epsilon$  gene, a thymidine kinase gene was inserted for negative selection.

(b) Southern analysis clearly indicated that ES cell clone A7 represents a heterozygous targeting event. Southern analysis was performed with three independent probes.

Supplement Figure 3

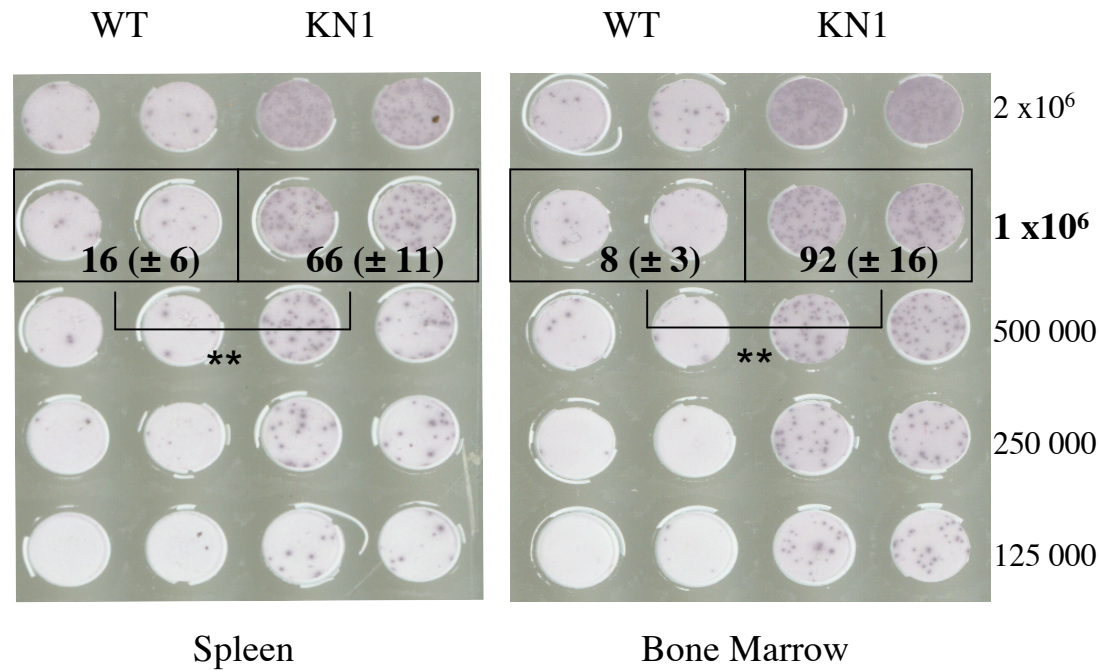

**Transwell migration assay of WT and KN1 IgE-ASCs.**

ELISpot analysis of IgE-ASCs originating from pooled spleen and bone marrow cells from 5 WT and 5 KN1 mice. For statistical analysis, IgE-ASCs were determined individually and extrapolated for 10<sup>6</sup> spleen or bone marrow cells. Values are means ± SD of five mice per time point.
